# Supplementary material
Source: Research Square preprint supplement (doi:10.21203/rs.3.rs-9397081/v1)
Supplement: Supplementary file 1 [file c5990d688e72d1908c98ea81.docx]

**Histopathological findings (Slides)**

**
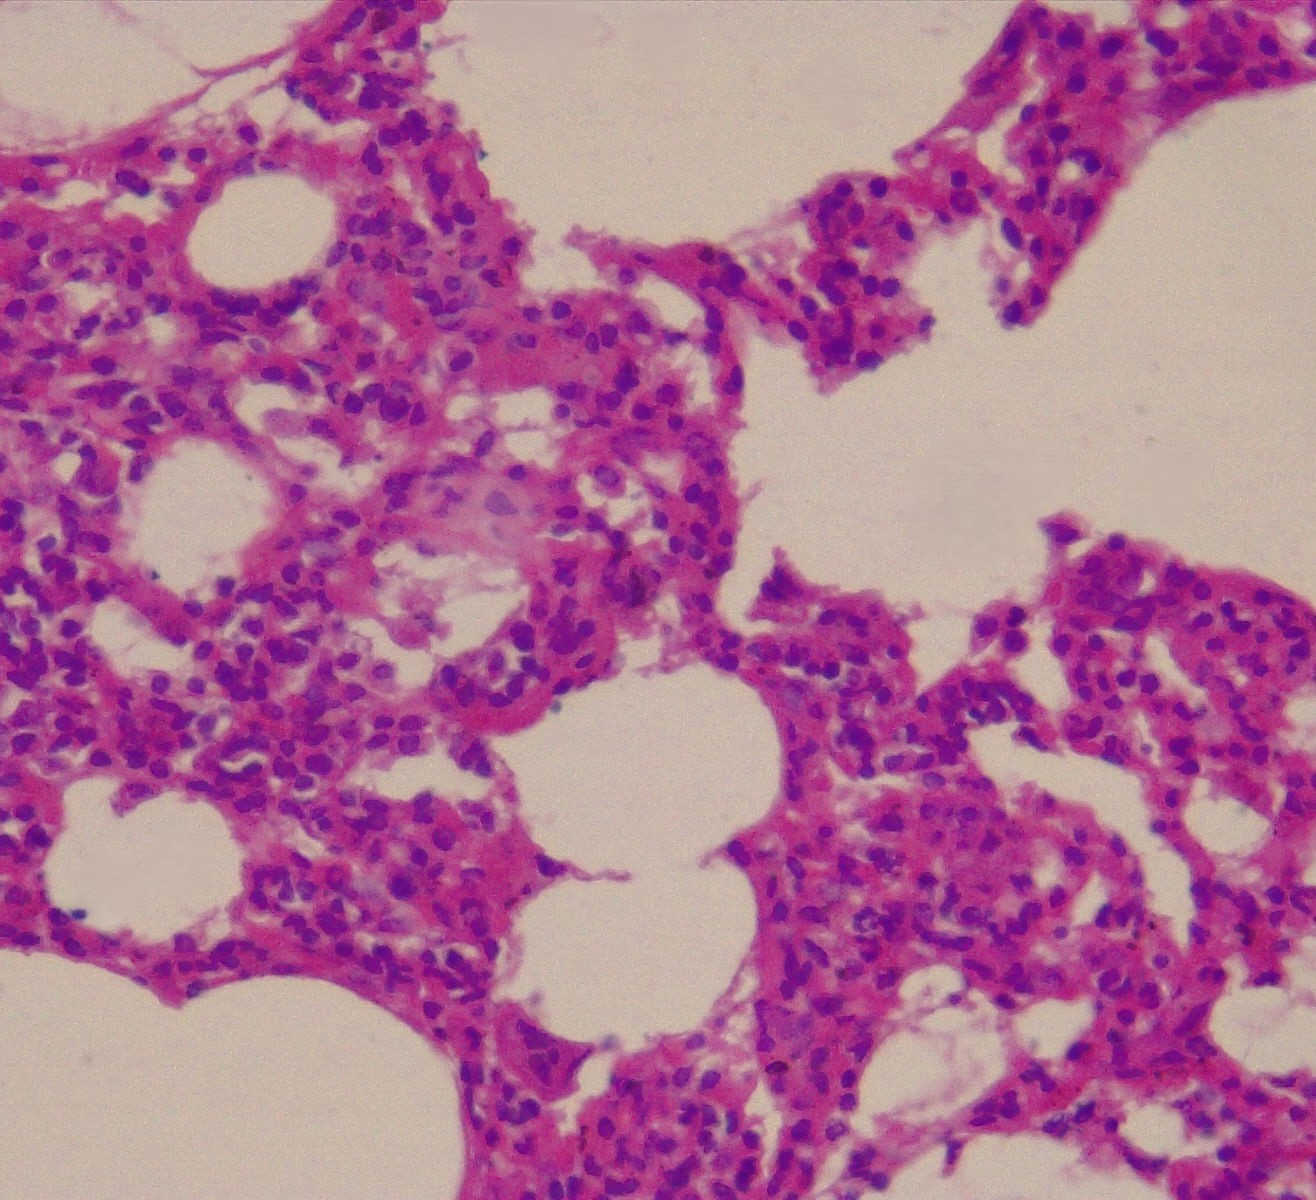
**
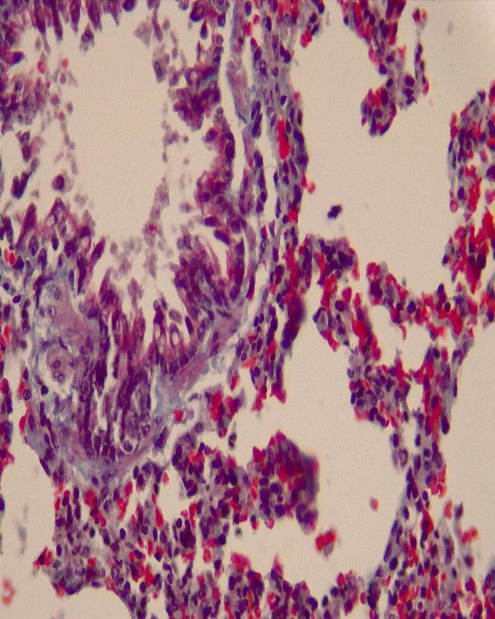


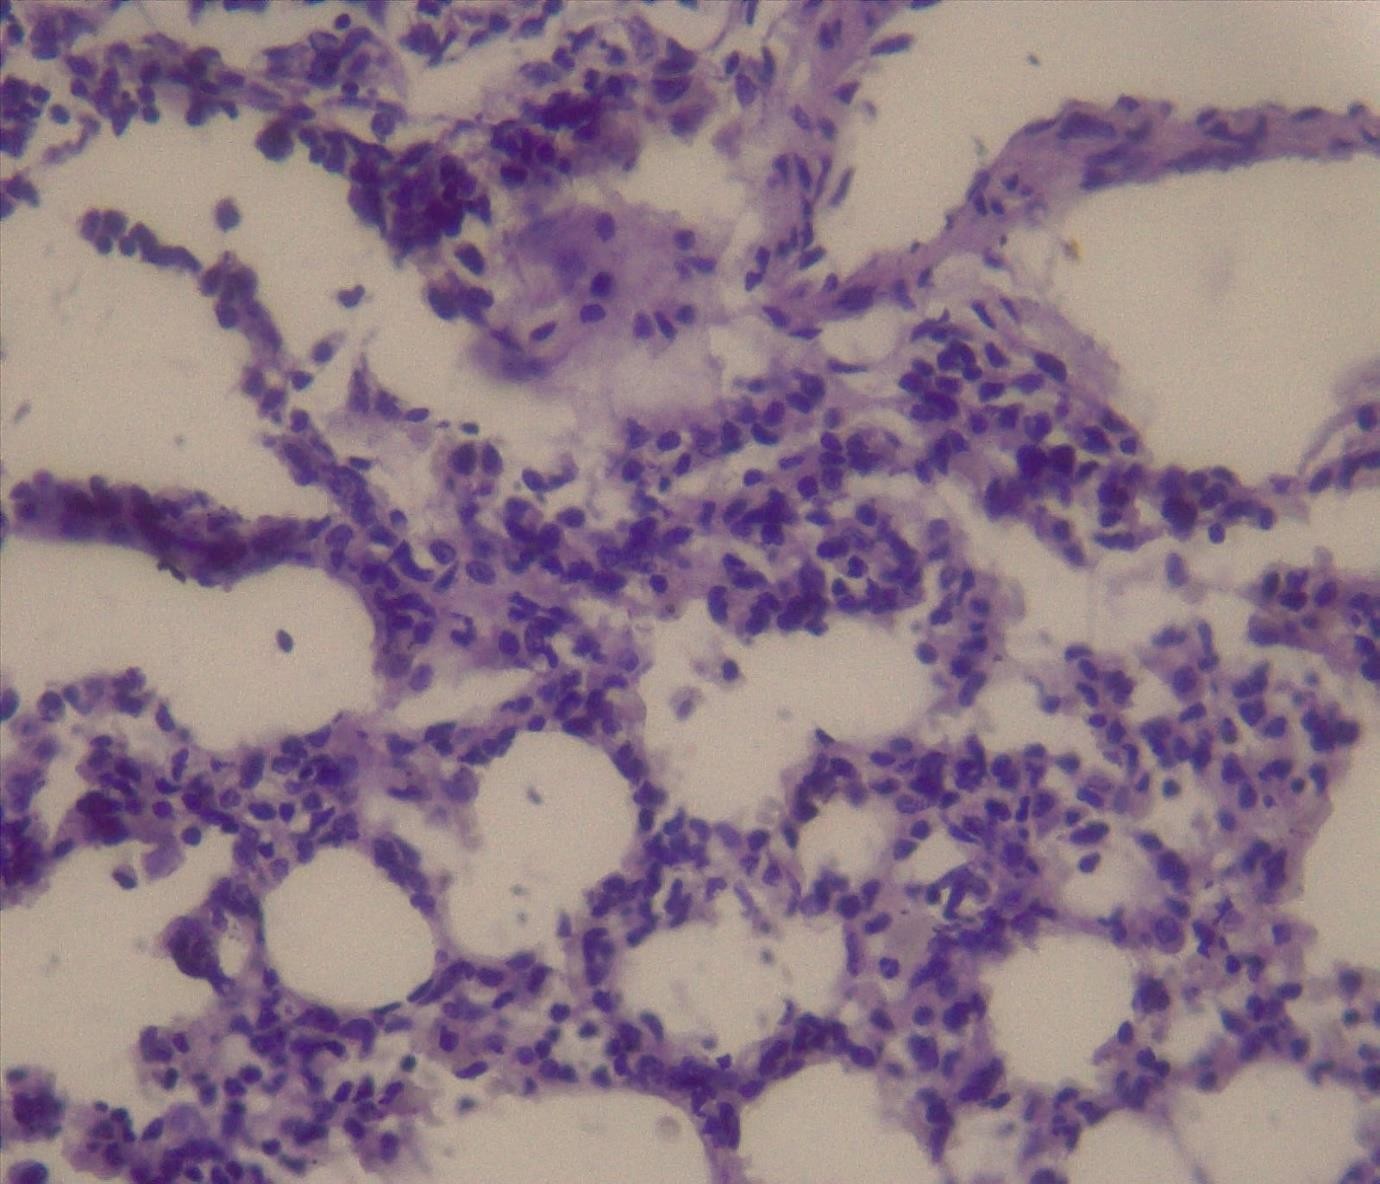


**Plates 1,2, 3- Control group X400 slides stained with H&E, Masson trichome and PAS**

Sections of the lung shows a normal lung tissue stain (yellow arrow=alveolus, blue arrow=bronchiole, red arrow= alveoli ducts) that are separated by the interstitium.


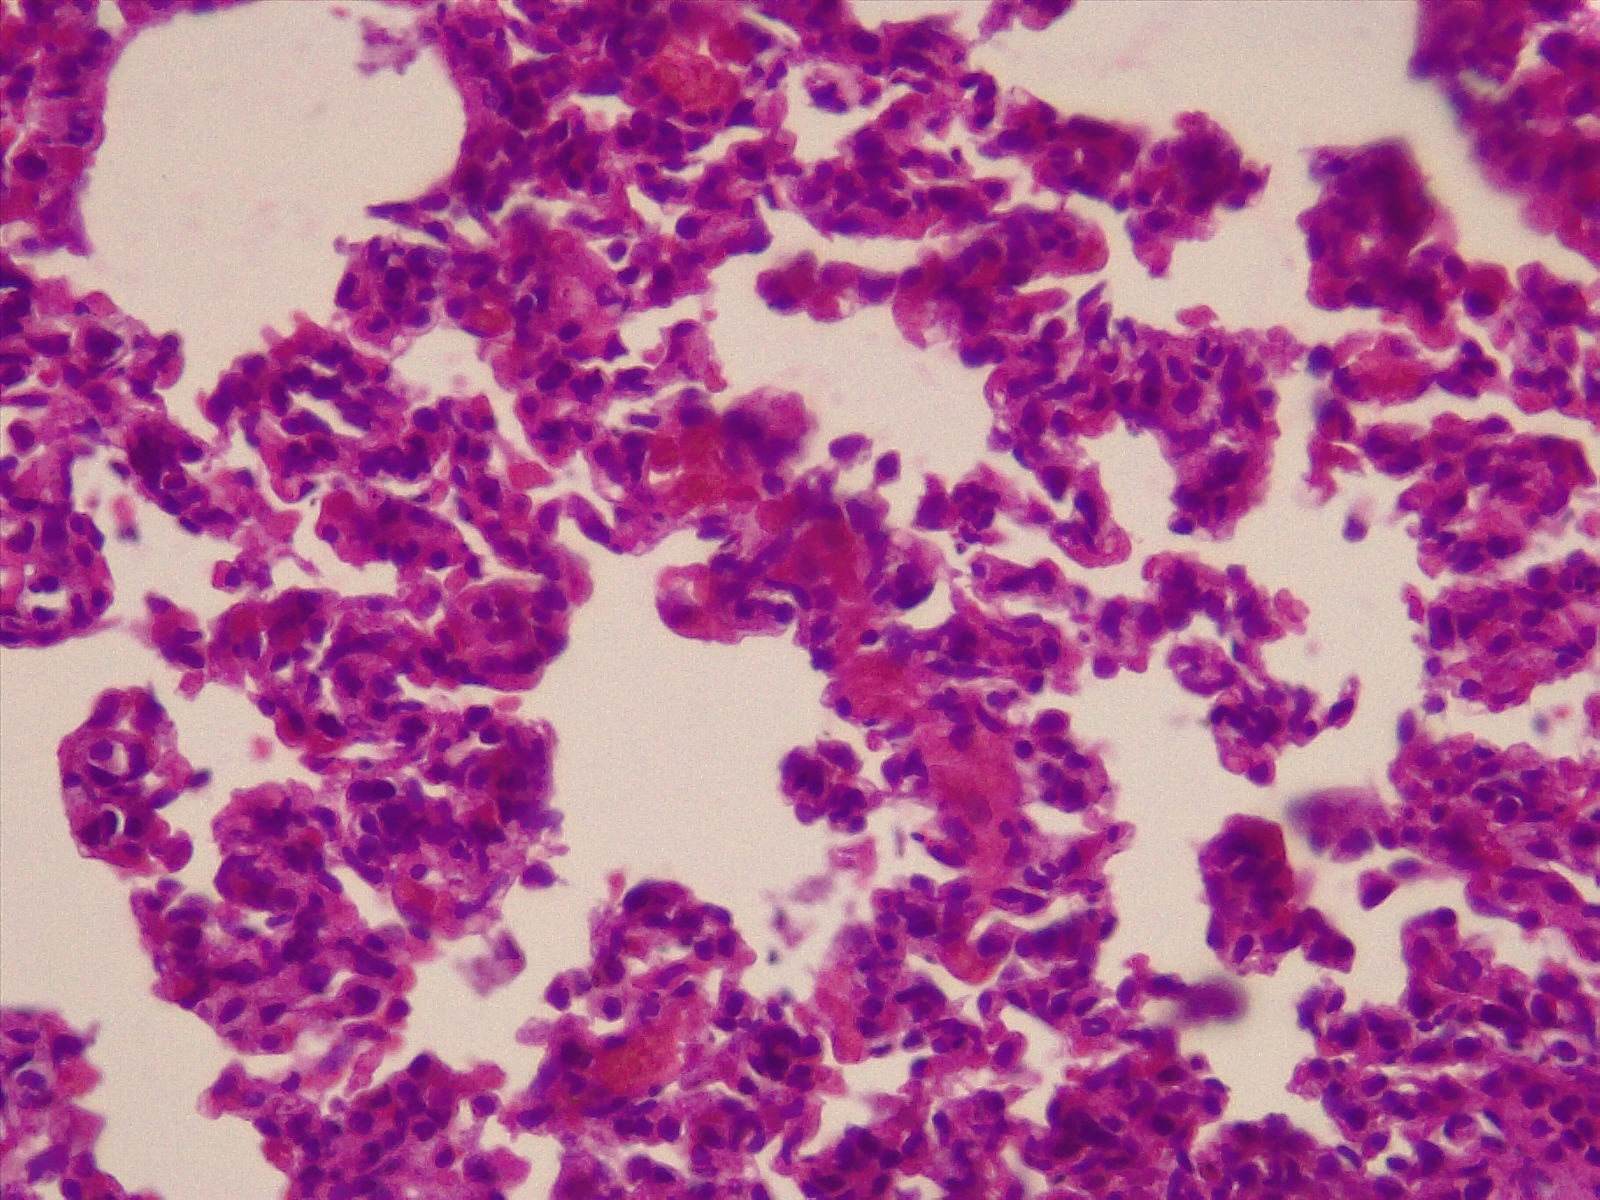


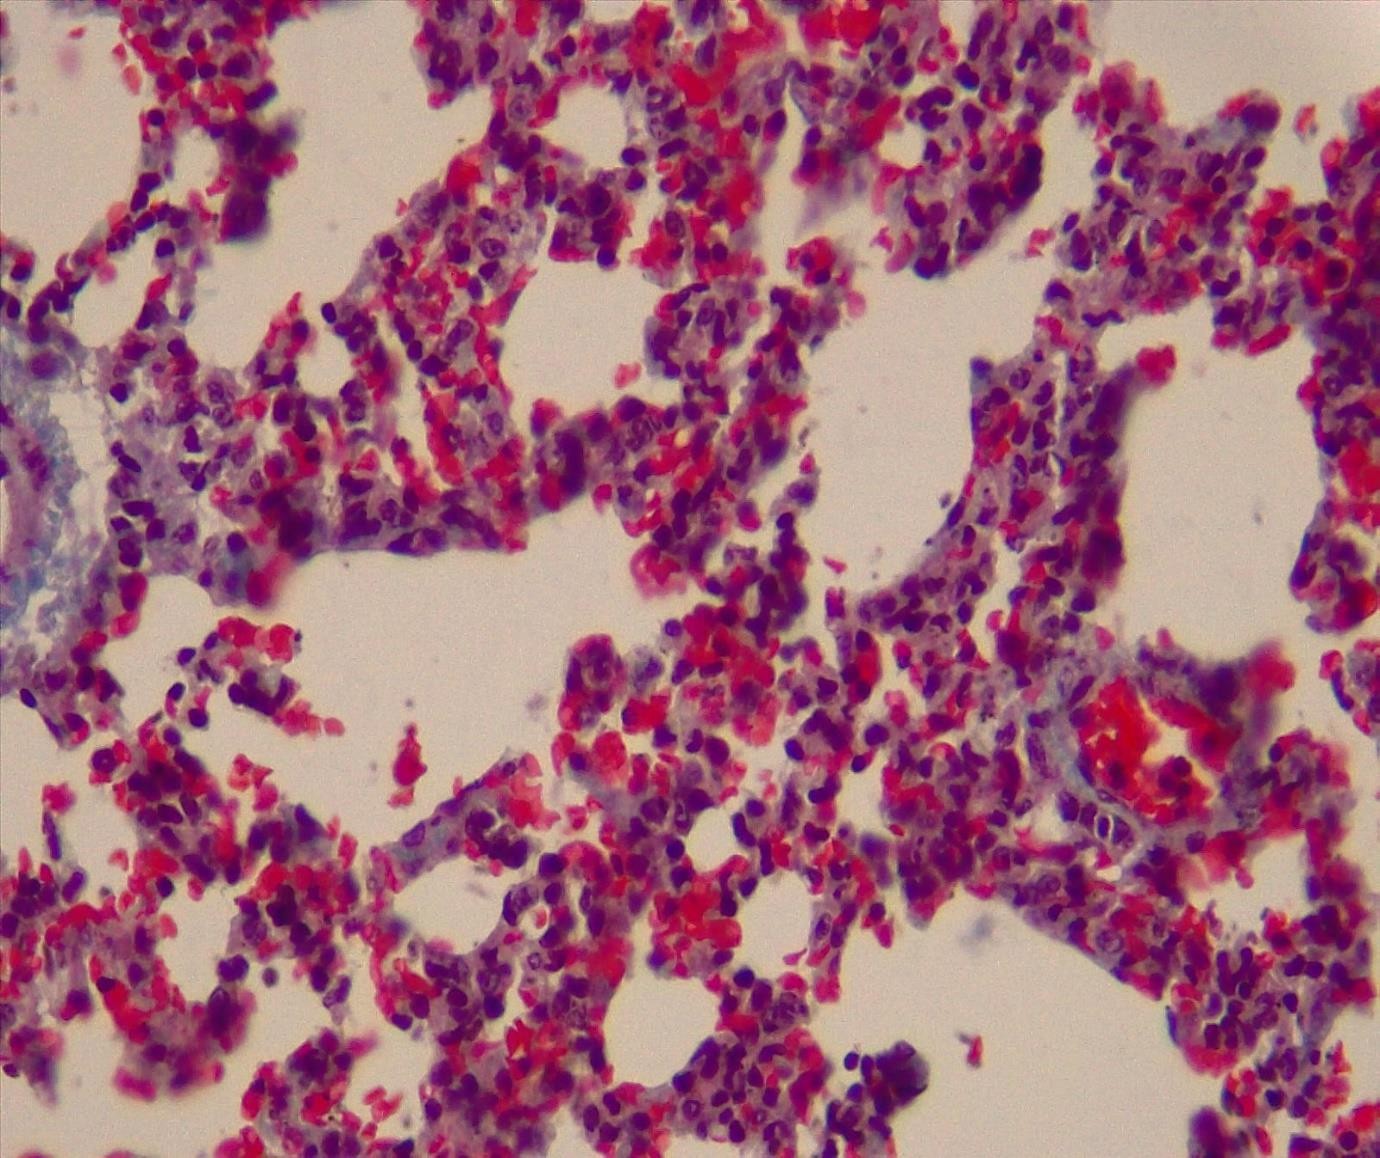

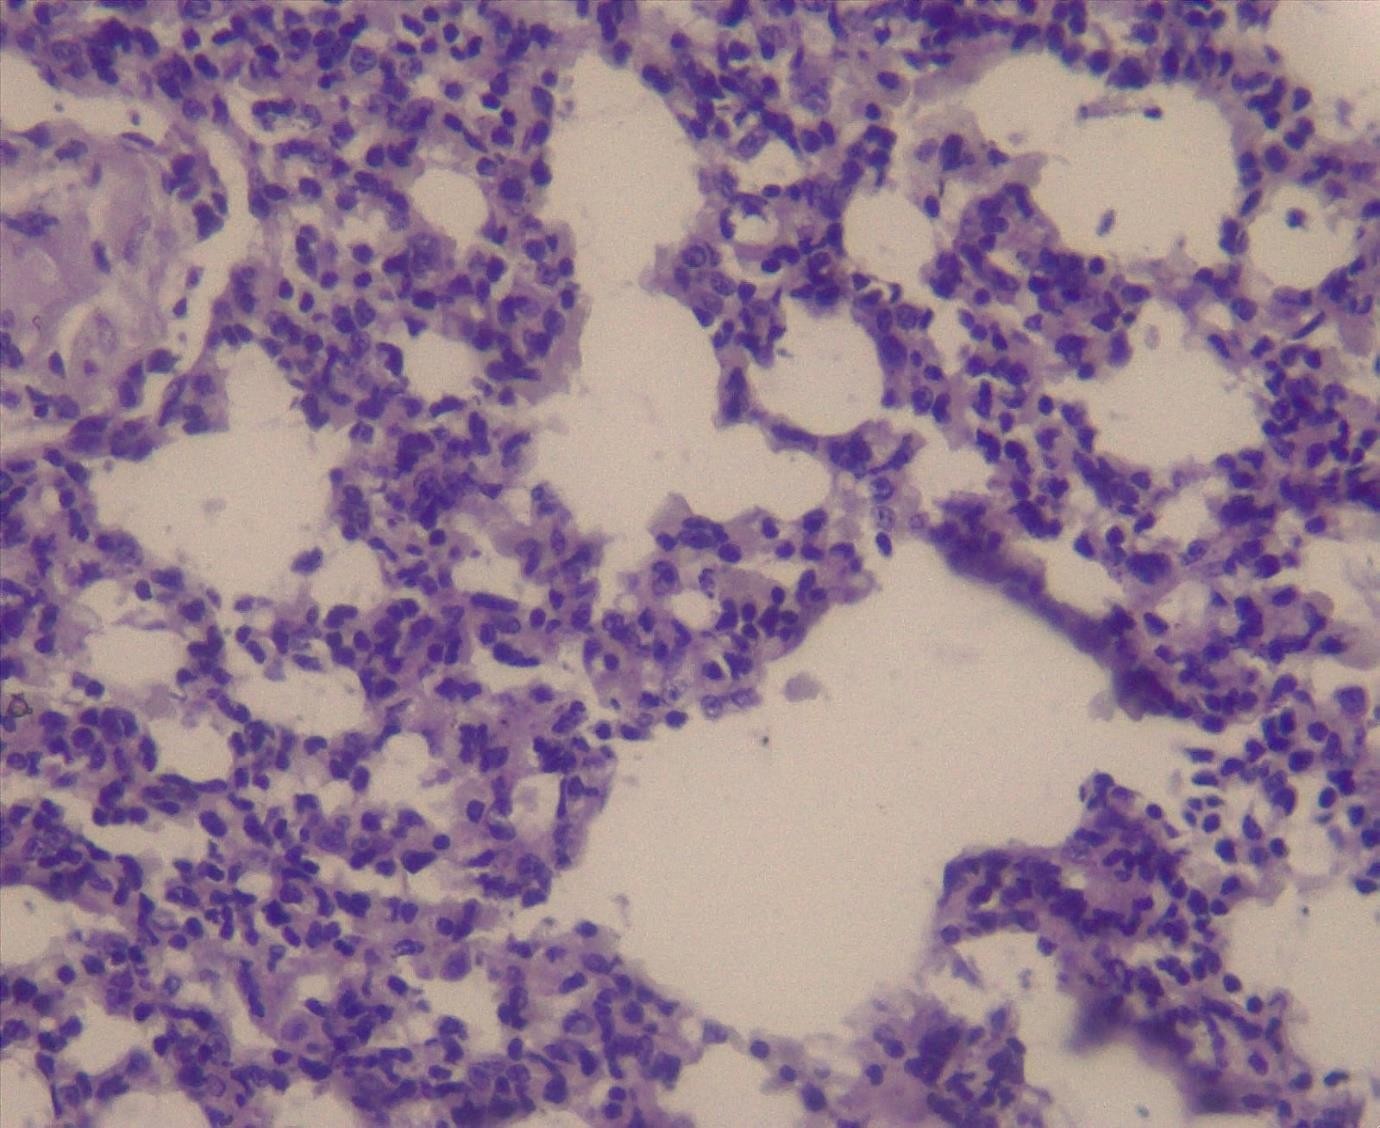


**Plates 4,5,6 – Group B (3hrs exposure) X400 slides stained with H&E, Masson trichome and PAS:** Sections of the lung shows normal lung tissue stains (yellow arrow=alveolus, black arrow= blood vessel, blue arrow= alveoli sac) that are separated by the interstitium.


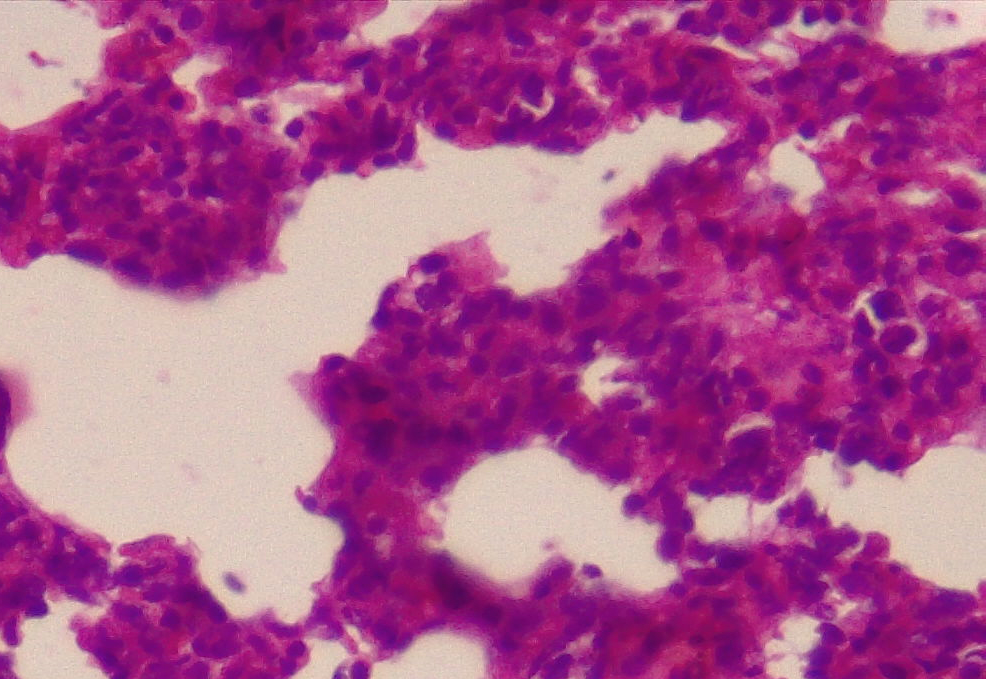

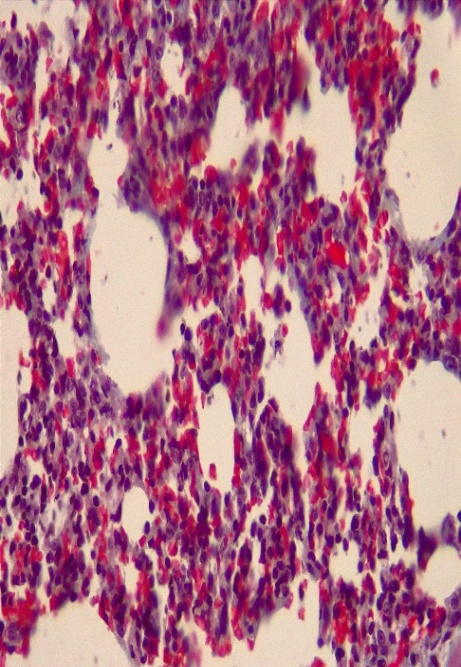

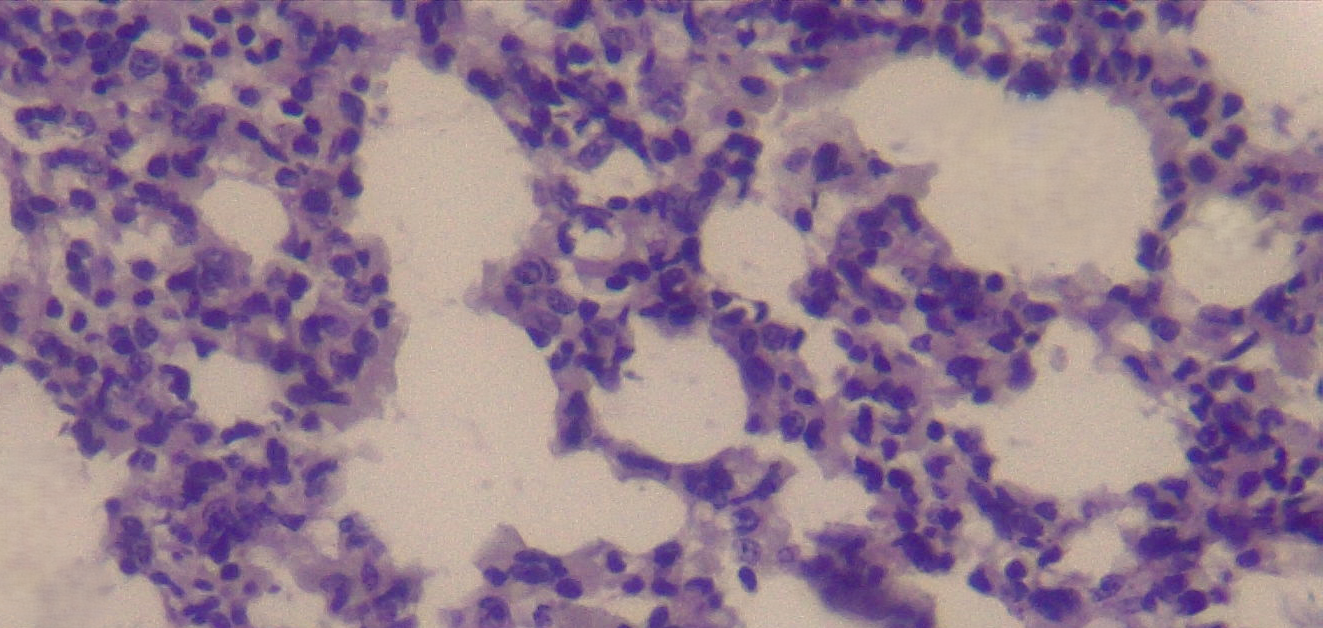


**Plates 7,8 9 – Group C (5hrs exposure) X400 slides stained with H&E, Masson trichome and PAS:** Sections of the lung shows normal lung tissue stains (red & blue arrow=alveoli duct) that are separated by the interstitium.


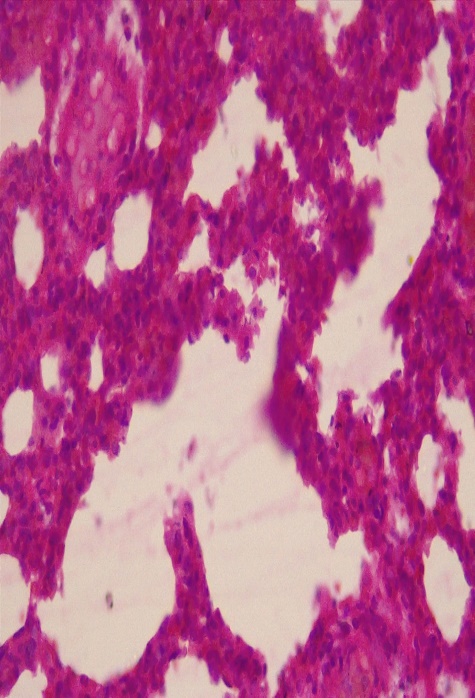

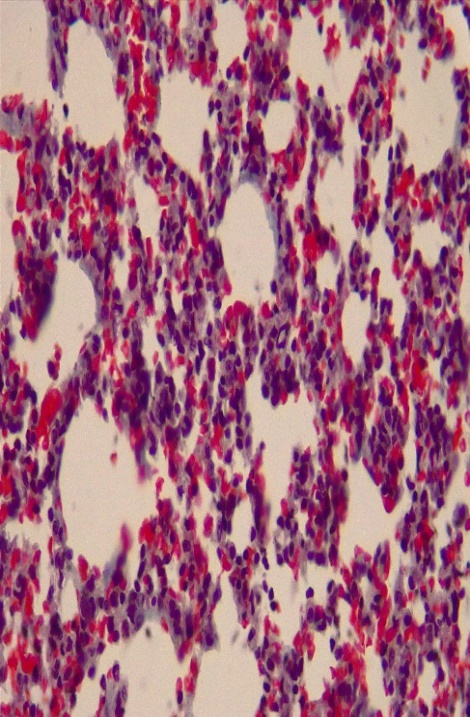

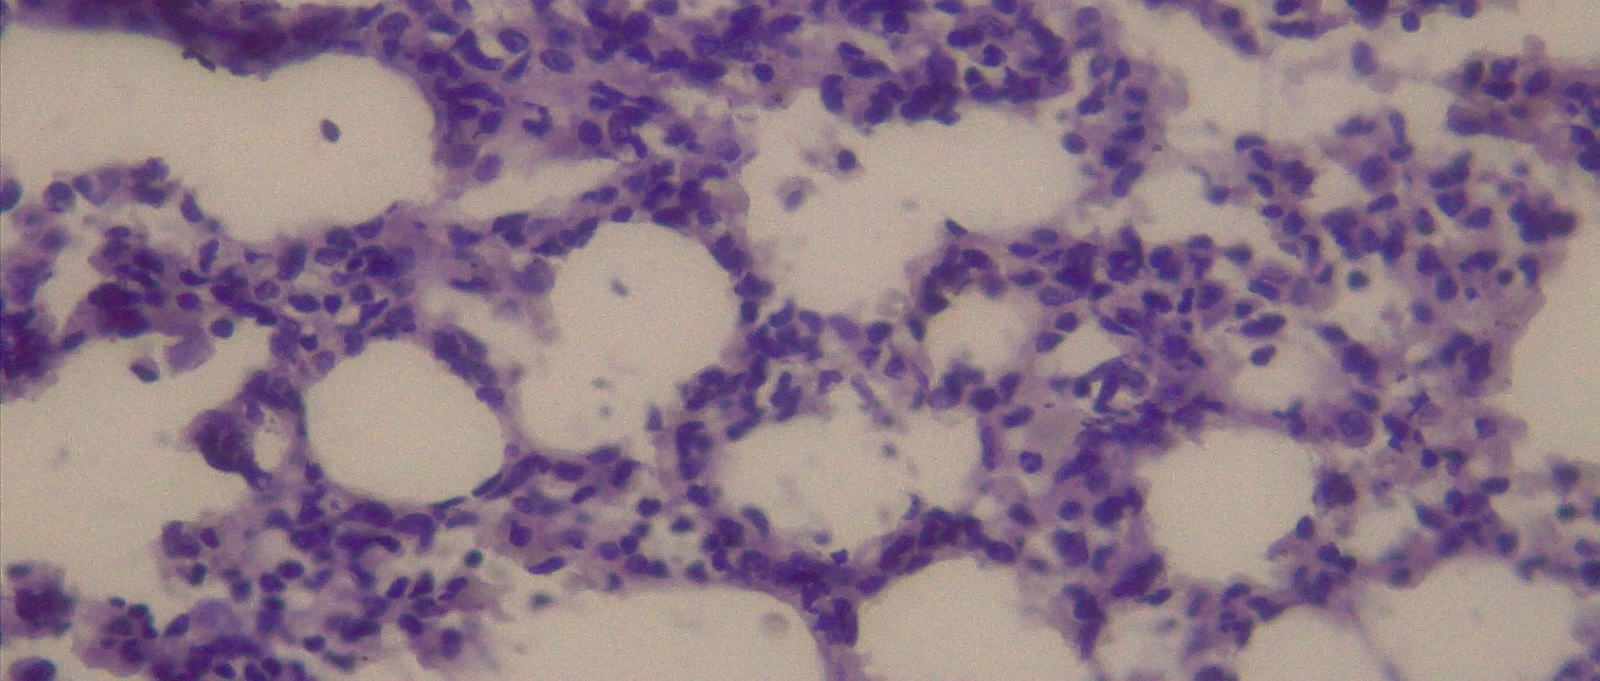


**Plates 10,11, 12 – Group D (7hrs exposure) X400 slides stained with H&E, Masson trichrome and PAS:** Sections of the lung shows normal lung tissue stains (black arrow= inflammatory infiltrate, blue arrow= alveolus and yellow arrow = alveoli duct) that are separated by the interstitium with increased pneumocytes activities
